# Supplementary material for: Density functional theory (DFT) investigation on the structure and photocatalysis properties of double-perovskite Gd1−xCaxBaCo2O5+δ (0 ≤ x ≤ 0.4)
Source: Royal Society of Chemistry journal article supplement (doi:10.1039/c9ra02820j), 2019-01-01
Supplement: c9ra02820j1.pdf [file c9ra02820j1.pdf]

## Electronic Supplementary Information (ESI)

### Density functional theory (DFT) investigation on the structure and photocatalysis properties of double-perovskite $\text{Gd}_{1-x}\text{Ca}_x\text{BaCo}_2\text{O}_{5+\delta}$ ( $0 \leq x \leq 0.4$ )

Rong Zhang,<sup>a,c</sup> Bo Xiang,<sup>b,†</sup> Lei Xu,<sup>a,c</sup> Liru Xia,<sup>a,c</sup> Chunhua Lu,<sup>d,†</sup>

Table S1. Lattice parameters of  $\text{Gd}_{1-x}\text{Ca}_x\text{BaCo}_2\text{O}_{5+\delta}$  ( $0 \leq x \leq 0.5$ )

| $x$ | Lattice parameters |                    |                    | Cell volume ( $\text{\AA}^3$ ) |
|-----|--------------------|--------------------|--------------------|--------------------------------|
|     | a ( $\text{\AA}$ ) | b ( $\text{\AA}$ ) | c ( $\text{\AA}$ ) |                                |
| 0   | 3.91               | 3.87               | 7.54               | 114.12                         |
| 0.1 | 3.92               | 3.87               | 7.55               | 114.43                         |
| 0.2 | 3.91               | 3.88               | 7.54               | 114.48                         |
| 0.3 | 3.92               | 3.86               | 7.55               | 114.50                         |
| 0.4 | 3.92               | 3.88               | 7.55               | 114.72                         |

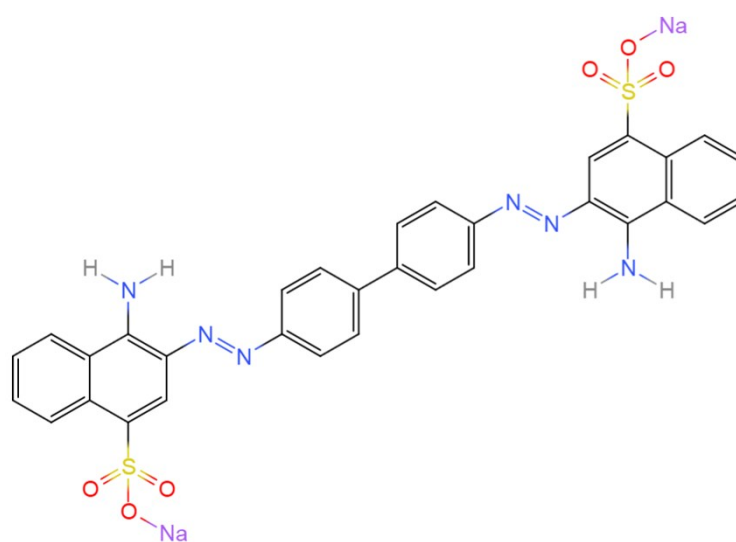

Fig. S1. Chemical structural molecular formula of congo red.

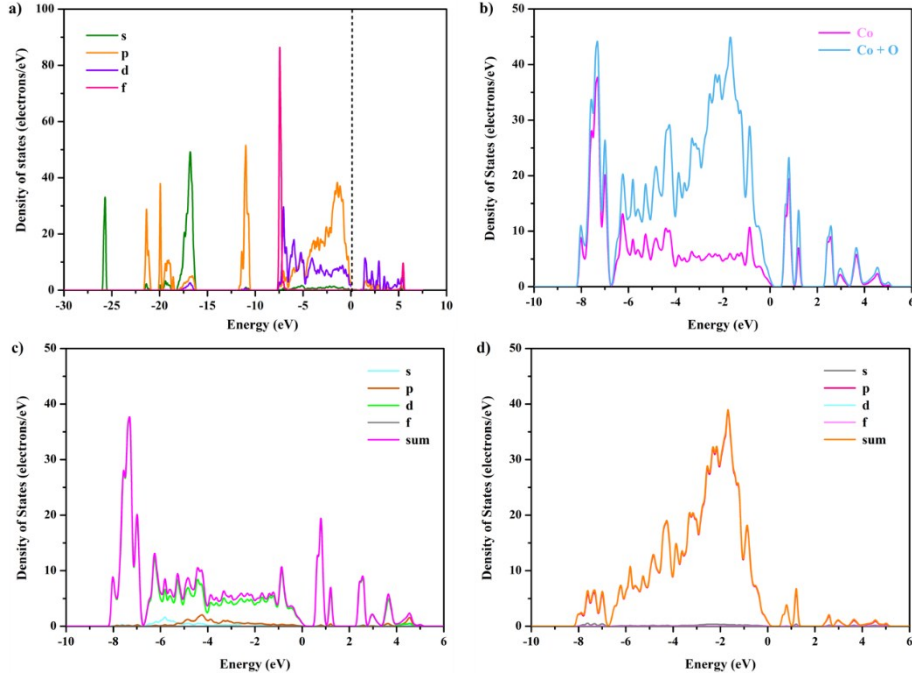

**Fig. S2.** Electronic density of states of the simulated  $\text{GdBaCo}_2\text{O}_{5+\delta}$ : (a) the total density of states, (b) Sum of Co and O density of states, (c) the partial DOS (PDOS) for Co, (d) the partial DOS (PDOS) for O.  $(U_{3d^x, f_{3d}^y}^{\text{Co}}) = (5, 0)$  eV in all cases. The

Fermi energy is set at 0 eV.

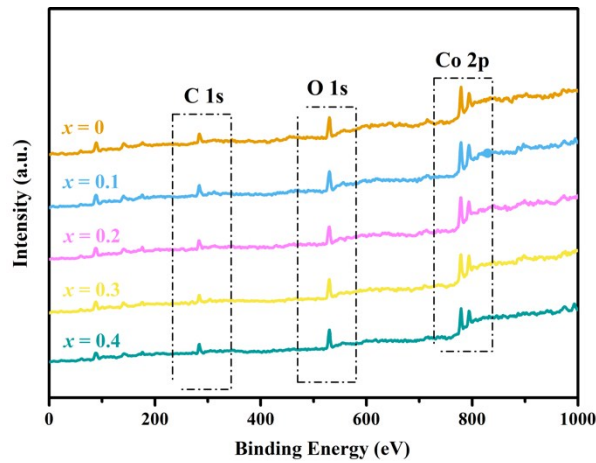

**Fig. S3.** XPS spectra for the  $\text{Gd}_{1-x}\text{Ca}_x\text{BaCo}_2\text{O}_{5+\delta}$  ( $0 \leq x \leq 0.4$ ) specimens: wide-survey spectrum (the binding energy is from 0 to 1000 eV)

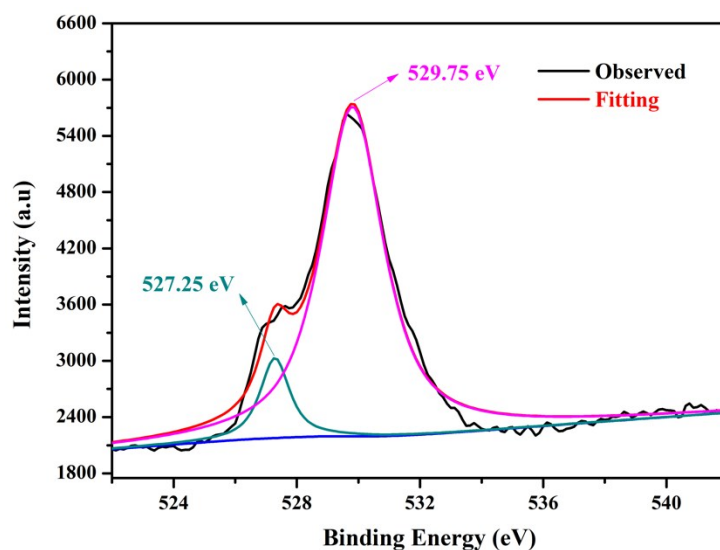

**Fig. S4.** XPS spectra for  $\text{Gd}_{0.8}\text{Ca}_{0.2}\text{BaCo}_2\text{O}_{5+\delta}$ : O-1s core-level (the binding energy is from 522 to 542 eV).

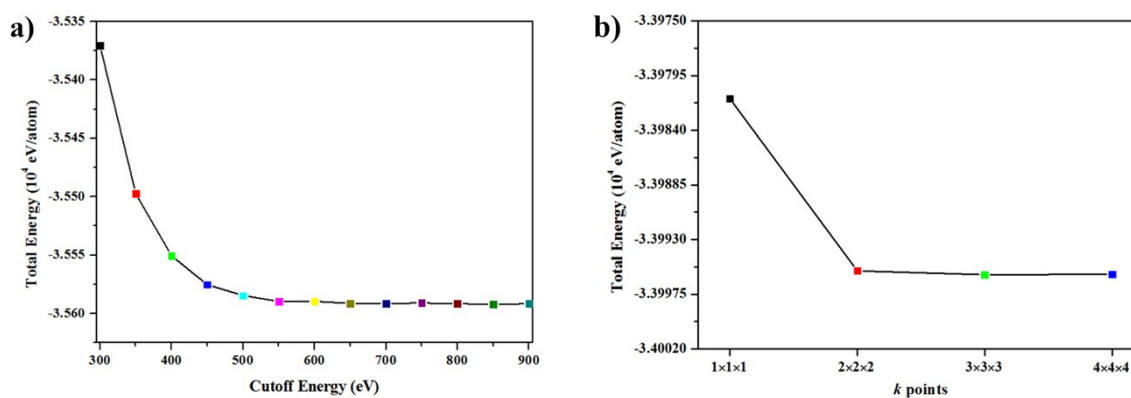

**Fig. S5.** Statistical curve of convergence test results: a) cutoff energy; b)  $k$  points.
